# Supplementary material
Source: PubMed Central journal article supplement (PMC9220987)
Supplement: NIHMS1812306-supplement-Supplemental_Figure_2.pdf [file NIHMS1812306-supplement-Supplemental_Figure_2.pdf]

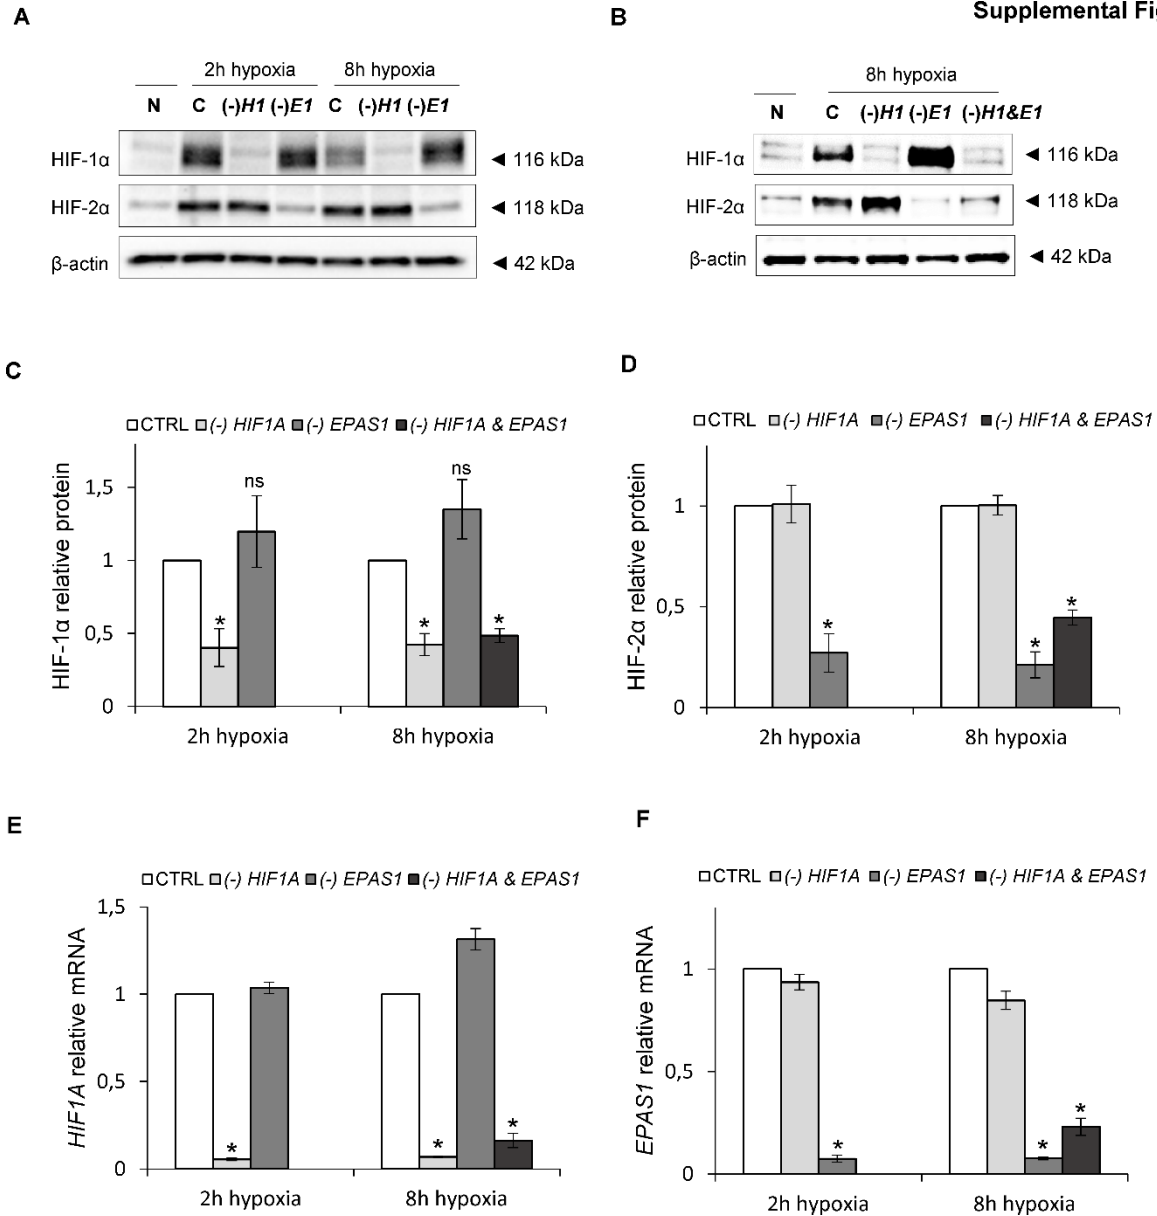

**Supplemental Figure 2.** *HIF1A* and *EPAS1* silencing in HUVECs exposed to hypoxia. (A and B) HIF-1 $\alpha$  and HIF-2 $\alpha$  protein levels were evaluated in normoxia and hypoxia, and by Western Blot and normalized to  $\beta$ -actin and total protein levels, and related to the control at the specific time-points of hypoxia. To simultaneously detect without stripping HIF-1 $\alpha$  and HIF-2 $\alpha$ , which are of similar molecular mass, the same samples were loaded onto two gels and two blots were prepared – each was used to detect each HIF $\alpha$  isoform. The respective densitometry analysis of HIF-1 $\alpha$  (C) and HIF-2 $\alpha$  (D) represents three independent experiments (the error bars represent SD, \*  $P$  value < 0.05 was considered significant). N – normoxia; C – hypoxia, negative control siRNA; H1 – hypoxia, *HIF1A* siRNA; E1 – hypoxia, *EPAS1* siRNA. The corresponding *HIF1A* (E) and *EPAS1* (F) mRNA levels were quantified by quantitative real-time PCR and normalized to *RPLP0* rRNA levels and expressed as a fold change over control at the specific time-point

of hypoxia. Data represent the mean  $\pm$  SEM of three biological replicates (\*P < 0.05 was considered significant); ns – not significant. These sample sets were also used as a material for verification of HRE sequences.
