# Supplementary material
Source: PubMed Central journal article supplement (PMC9220987)
Supplement: NIHMS1812306-supplement-Supplemental_Figure_3.pdf [file NIHMS1812306-supplement-Supplemental_Figure_3.pdf]

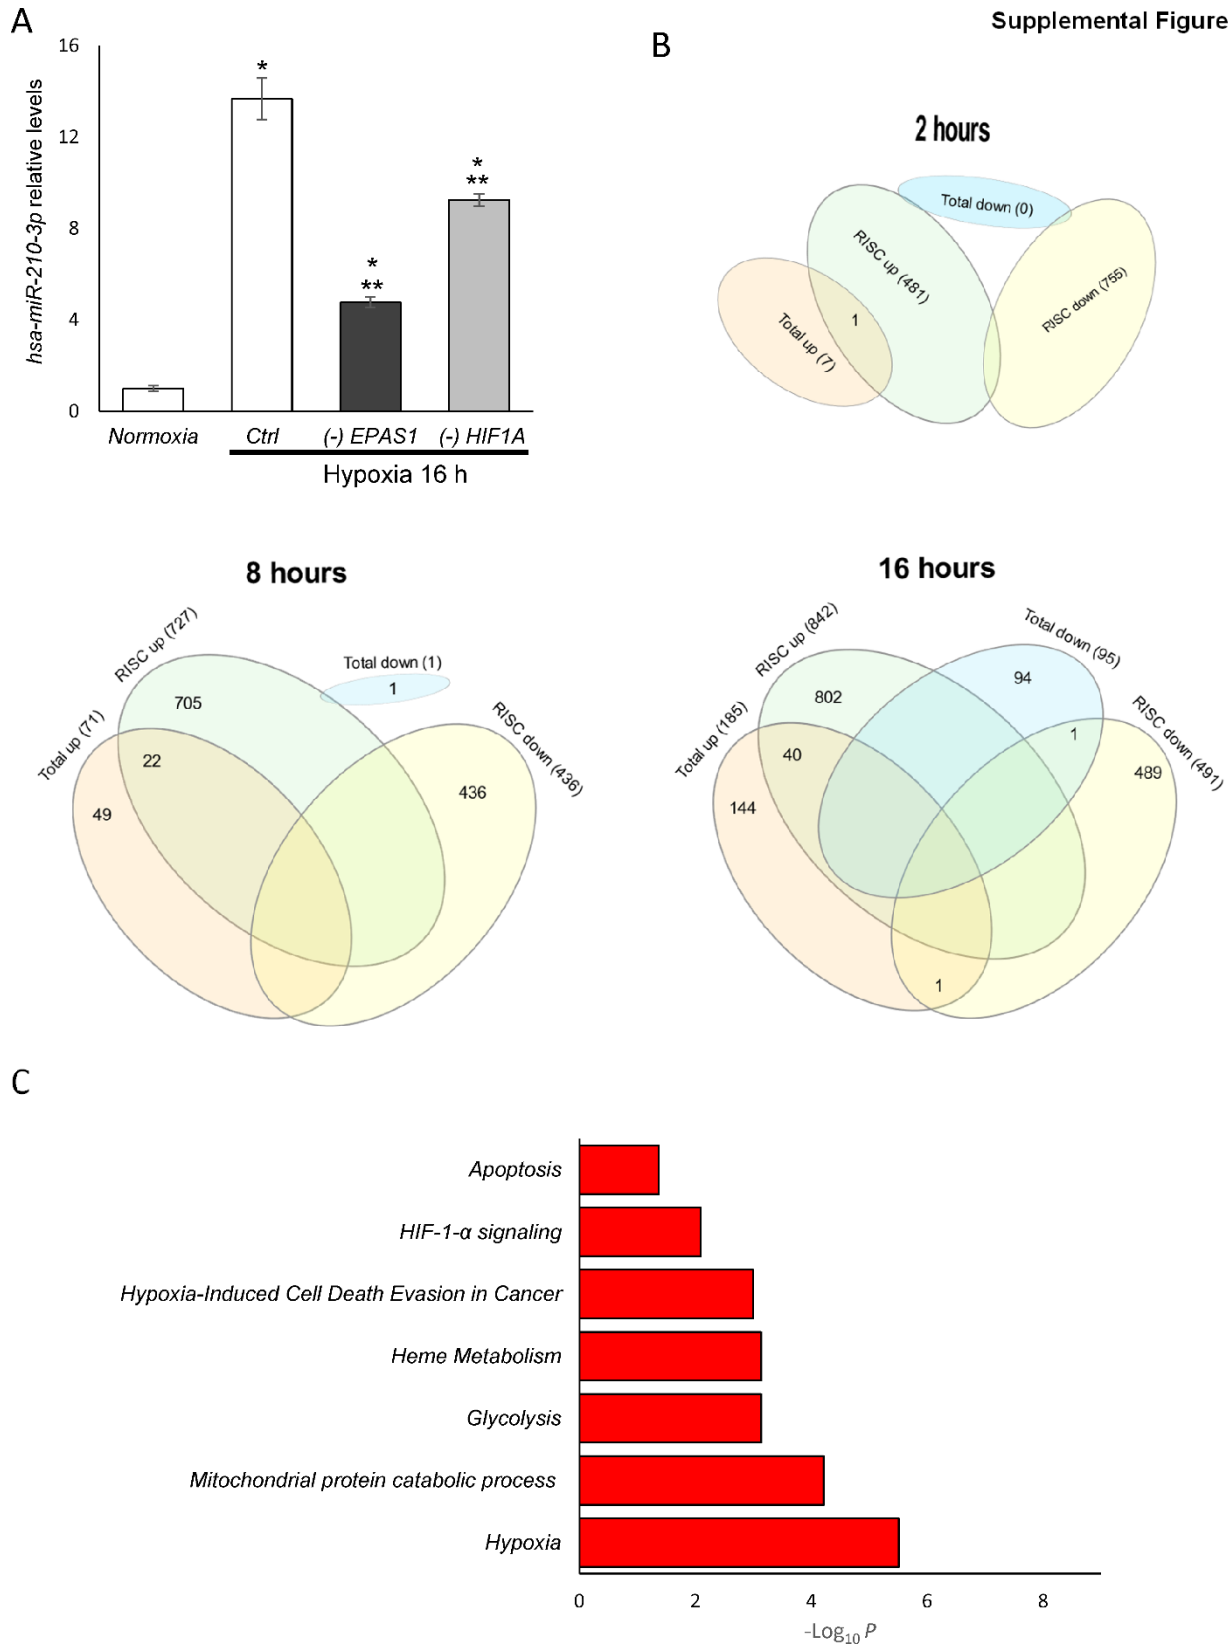

**Supplemental Figure 3. (A)** *HIF-2* modulates expression of *miR-210-3p* in HUVECs exposed to hypoxia for 16 hours. *miR-210-3p* levels were normalized to *RNU44* and expressed as a fold change over control in normoxia. The data represent mean of 3 biological replicates (3 technical replicates each)  $\pm$  SEM of three (\* $P < 0.05$  was considered

significant). **(B)** Comparison of global significant mRNA changes in HUVECs exposed to hypoxia for 2 h and 16 h that were previously detected in microarray experiments (61) with the respective RISC mRNA components. **(C)** The mRNAs that were common in 16 hours hypoxia exposed HUVECs were assigned with the Enrichr database to cellular signaling pathways and selected based on  $Q$  value  $< 0.05$ .
